# Supplementary material
Source: HighWire-hosted journal article supplement (https://cmajopen.ca/highwire/filestream/88766/field_highwire_adjunct_files/1/open-2021-0295-original-submission.pdf)
Supplement: open-2021-0295-original-submission.pdf [file open-2021-0295-original-submission.pdf]

1  
2  
3 **The impact of OHIP+ universal pharmacare on prescription drug use and costs among children**  
4 **and youth under 25 years in Ontario: A time-series analysis.**  
5

6 Benard N. Miregwa, MSc, MPH, PhD (c)1§ Anne Holbrook, MD, PharmD, MSc, FRCPC 2,3  
7 Michael R. Law, PhD4 John N. Lavis, MD, PhD3,5-6 Lehana Thabane, PhD3 Lisa Dolovich, MSc,  
8 PharmD3,7 Michael G. Wilson, PhD3,5-6  
9

- 10  
11  
12  
13  
14  
15  
16  
17  
18  
19  
20
1. Health Policy PhD Program, McMaster University, Hamilton, Canada
  2. Division of Clinical Pharmacology & Toxicology, McMaster University, Hamilton, ON L8N 3Z5, Canada
  3. Department of Health Evidence and Impact, McMaster University, Hamilton, Canada
  4. Centre for Health Services and Policy Research, School of Population and Public Health, University of British Columbia, #201 – 2206 East Mall, Vancouver, BC, V6T 1Z3, Canada
  5. McMaster Health Forum, McMaster University, Hamilton, Canada
  6. Centre for Health Economics and Policy Analysis, McMaster University, Canada
  7. Leslie Dan Faculty of Pharmacy, University of Toronto, 144 College St, Toronto, ON M5S 3M2, Canada

21 §Corresponding author  
22

23 Details of the corresponding author:

- 24  
25  
26  
27
- Address: 1280 Main Street West, MML-417 Hamilton ON Canada L8S 4L6,
  - Telephone number: +1-905-525-9140 ext 22121; +1 647-571-4454
  - Email: miregwab@mcmaster.ca

28 Word count: 2408 (not including references and exhibits)

29 Abstract word count: 276

30 Exhibits: 3 tables; 2 figures  
31

32 To be submitted for publication to the *CMAJ*. Copyright will be assigned when accepted.  
33  
34

35 **Key messages:**

- 36  
37  
38  
39  
40  
41  
42  
43  
44  
45  
46  
47  
48  
49  
50  
51  
52  
53  
54  
55  
56  
57  
58  
59  
60
- Adopting a universal pharmacare model (OHIP+) in Ontario for those under 25 years led to a significant increase in publicly covered prescriptions and plan expenditures as predicted.
  - A later modification of OHIP+ that restricted eligibility to only those who do not have private drug insurance coverage led to a significant decrease in publicly covered prescriptions and plan expenditures.
  - This study is useful to inform the ongoing debate over national pharmacare in Canada, largely confirming the government's predicted cost of OHIP+.
  - Future research should examine associations of the implementation and changes in policy with health outcomes.

## **Abstract**

**Introduction:** In January 2018, Ontario implemented a universal pharmacare program (OHIP+) for people under 25 years old, providing full coverage of prescription medications included in the provincial formulary. OHIP+ was modified in April 2019 to exclude private drug-insurance holders. We assessed the utilization and costs of publicly covered prescriptions before and after the implementation and modification, using British Columbia (BC) as control.

**Methods:** We conducted a population-based interrupted time-series analysis using the CIHI NPDUIS prescription-drug claims data from January 2016 to October 2019. We assessed changes in the level and trend of publicly covered prescriptions and public sector expenditures after the introduction and modifications of OHIP+.

**Results:** Publicly covered prescriptions per 1,000 in ON increased by 74%, from 756 per 1,000 people in the two years before OHIP+ implementation, to 2,952 per 1,000 from January 2018 to April 2019 ( $p<0.001$ ), and following the program modification in April 2019 it decreased by 52% to 1,421 per 1,000 ( $p<0.001$ ). Similarly, total public drug expenditure increased by 255% from \$189 million CAD in 2017 to \$671 million CAD in 2018, then reduced by 70% to \$204 million CAD in 2019. Monthly public plan expenditures increased by \$115.94 (95%CI, \$100.93-\$130.94,  $p<0.001$ ) post OHIP+ implementation in 2018, and decreased by \$99.97 (95%CI, \$119.79-\$80.15,  $p<0.001$ ) per person per month after April 2019.

**Interpretation:** Adopting OHIP+ increased utilization of publicly funded prescription medicines and increased drug benefits costs with a substantial decrease in both following the modification. This study is useful to inform the debate over national pharmacare and largely confirmed the government predicted additional cost of OHIP+. Future research should investigate associations with health outcomes.

## **Background**

Universal Health Coverage (UHC) promotes access to necessary care and protects patients from health-related financial hardship that may affect health outcomes. The World Health Organization declared that governments are obligated to promote universal coverage of essential healthcare services, including prescription drugs<sup>1-4</sup>. Given the importance of reducing out-of-pocket spending for prescription drugs, universal access to affordable, safe and appropriately prescribed treatments is a significant health system goal in all countries<sup>2-5</sup>. However, approaches to UHC for prescription medications or universal pharmacare varies based on the population covered (who), health products and technologies (what) and the extent of coverage (proportion of direct costs covered). The amount spent on prescription drugs, including the per capita spending, has significantly increased over time<sup>4-7</sup>. Health-system expenditure on prescription drugs has also increased in many countries, often growing faster than other health-system costs<sup>5-14</sup>. Therefore, implementing universal pharmacare can enhance equitable access to needed care<sup>7-33</sup>.

While provincial and territorial health systems in Canada provide a single-payer system with coverage for medically necessary hospital and physician-based care, this universality does not extend to out-patient prescription medications.<sup>2-5</sup> Instead, prescription drugs are funded by a fragmented patchwork of public and private drug plans that varies by province and leaves many Canadians with little or no drug coverage.<sup>4-6</sup> Children and youth are a vulnerable population and the data produced has shown that younger adults are mostly disadvantaged in coverage and limited studies have investigated the status of coverage variation<sup>7-23</sup>. The provincial government implemented the Ontario Health Insurance Plan Plus (OHIP+) in January 2018, which offered full coverage for more than 4,400 medication products from the Ontario Drug Benefit (ODB) formulary. According to the provincial government, the estimated predicted additional annual investment was \$465 million to expand coverage of young people through OHIP+.<sup>25-26</sup> However, the initial scope of OHIP+ was modified in April 2019, restricting eligibility to those without private drug plans most often from parental coverage.<sup>25-27</sup> The primary objective of this study was to assess the impact of the introduction and the subsequent modification of OHIP+ on the number of publicly covered prescriptions and plan expenditures. The

1  
2  
3 secondary objective was to use the same metrics to assess prescription medications for two conditions  
4  
5 (asthma and diabetes).  
6  
7  
8

## 9 **Methods**

### 10 **Design**

11  
12 We used an interrupted time series (ITS) design to estimate changes in the number of publicly  
13 covered prescriptions and plan expenditures. It is a rigorous and commonly used method to examine  
14 the longitudinal effects of introducing new programs and policies<sup>17-30</sup>.  
15  
16  
17  
18  
19  
20  
21

### 22 **Setting and policy intervention**

23  
24 The implementation of OHIP+ in January 2018 and its modification in April 2019 provides two  
25 time points of interest. The original program offered full coverage for more than 4,400 medication  
26 products from the Ontario Drug Benefit (ODB) formulary for those under 25 years old. In April 2019,  
27 the program was modified to exclude private drug plan holders and those eligible for the Ontario Drug  
28 Benefit program (e.g., through the Trillium Drug Program and those receiving social assistance). We  
29 used the province of British Columbia (BC) as a non-equivalent control jurisdiction, as it had  
30 comparable coverage for youth and children and social assistance programs.  
31  
32  
33  
34  
35  
36  
37  
38  
39  
40

### 41 **Data sources**

42  
43 The National Prescription Drug Utilization Information System (NPDUIS) provided  
44 anonymized public prescriptions and drug plan reimbursement benefit aggregated numbers for ON and  
45 BC for 24 months preceding and 15 months following the adoption of OHIP+, and seven months after  
46 modifying OHIP+. The data set included medication class, product name, the dose of the drug, the  
47 number of active beneficiaries enrolled in the plan over each month, the number of paid beneficiaries,  
48 number of prescriptions, program paid in reimbursed dollars claims.<sup>8</sup>  
49  
50  
51  
52  
53  
54  
55  
56  
57

### 58 **Outcome variables**

1  
2  
3 The primary outcome variables for the primary and secondary analyses included: 1) number  
4 and rate of publicly covered prescriptions; and 2) public plan expenditure in Ontario through the study  
5 period. To calculate the overall utilization rate, we used the number of publicly covered prescriptions  
6 recorded as the total number of claims accepted per month divided by the general Ontario population  
7 aged 24 years and under as the intervention group and BC population as the control group. We then  
8 made the same calculations for the secondary analysis focused on asthma and diabetes prescription  
9 medications. Overall, public-plan expenditure was calculated as the average monthly public  
10 reimbursement dollars per person per population for all prescription drugs for Ontario and BC. The  
11 Ontario and BC population were linearly interpolated for each month from annual Statistics Canada  
12 population estimates over the study period.  
13  
14  
15  
16  
17  
18  
19  
20  
21  
22  
23  
24  
25

### 26 **Data analysis plan**

27  
28 We used a segmented regression analysis model. Utilization rates were calculated in three  
29 segments, each with multiple observations: 1) before the first OHIP+ policy change or adoption of  
30 OHIP+; 2) after the first policy change, and 3) after the second policy change or modification. We fit  
31 the segmented regression models using a generalized least squares model and incorporated appropriate  
32 autocorrelation parameters for each model based on standard diagnostic criteria<sup>19</sup>. The intervention and  
33 control group models included terms for the existing level and trend in the outcome and changes or  
34 shifts on both the level and trend, as they also included an indicator variable for January, as use and  
35 cost change with a rollover of the OHIP+ in that month. The underlying assumption in such models is  
36 that the ON trend would change in the same manner as BC absent OHIP+ policy change. No sensitivity  
37 analyses were conducted.  
38  
39  
40  
41  
42  
43  
44  
45  
46  
47  
48  
49  
50

### 51 **Ethics approval**

52  
53 Ethics approval was provided by the Hamilton integrated research ethics board (HiREB) before  
54 conducting the study (protocol number #10991-C).  
55  
56  
57  
58  
59  
60

## **Results**

Table 1 contains data on the monthly counts and selected characteristics of the OHIP+-eligible residents < 25 years of age who filled publicly covered prescriptions during the study period. The total number of people covered by all ODB and BC drug plans averaged 260,930 and 119,881 per month, respectively. The study sample from Ontario was evenly balanced between younger age groups (0-17 years) and older (18-25 years), gender, but not for socioeconomic status (SES) where 60% of those who received the publicly covered prescriptions were from either low or low-middle SES.

### **Prescription utilization**

#### *Overall prescription use*

The total number of publicly covered prescriptions paid for by the benefits plan over the 46-month period was 24,869,544.

As shown in Figure 1 and Table 2, we found a level increase rate of 2.13 publicly covered prescriptions per person per month paid for by the plans at the implementation (95% CI 1.89 to 2.37) and a significant immediate level drop at the modification of -1.61 publicly covered prescriptions per person per month (95% CI -1.95 to -1.26) and no statistically significant increase in the trends after that. Compared to BC, where utilization was stable, overall publicly covered prescriptions in ON increased by 74%, from a mean of 756 per 1,000 young people in the two years before OHIP+ implementation, to 2,952 per 1000 from January 2018 to April 2019, then decreased by 52% to 1,421 per 1,000 as shown in Table 3.

#### **Asthma and diabetes drug prescription use**

As shown in Table 2, we found an immediate increase of 0.27 publicly covered prescriptions per person per month for asthma paid for by the plans at the first policy change (95% CI 0.20 to 0.35), and an immediate drop of 0.16 publicly covered prescriptions per person per month at the second policy change (95% CI -0.24 to - 0.08). For both policy intervention changes there was no statistically significant increase in the trend thereafter. On the other hand, we found a level increase of 0.03 publicly

1  
2  
3 covered drug prescriptions per person per month for diabetes paid for by the plans at the first policy  
4 change (95% CI 2.35 to 3.40) and a significant immediate level drop at the second policy change of -  
5 0.02 publicly covered prescriptions per person per month (95% CI -2.84 to -1.49) and no statistically  
6 significant increase in the trends thereafter.  
7  
8  
9  
10

11 Many of the changes in publicly covered prescription use for asthma and diabetes prescriptions  
12 were substantial with increases of 100% or more and dropping for the overall and individual ingredients  
13 by 50% or more (see Table 3). The largest increases for the monthly mean asthma publicly covered  
14 prescriptions were reported for omalizumab, mometasone, vilanterol fluticasone, and budesonide (all  
15 reporting above 900% change). The largest declines were for ivacafter and mometasone which reported  
16 more than 90% change. Whereas for diabetes, the largest increase for the monthly mean publicly  
17 covered prescriptions change were for insulin glulisine and empagliflozin reporting > 700% change.  
18 The largest decline was found for insulin detemir, insulin aspart, and for diagnostic agents - test strips,  
19 all reporting a decline by more than 65% (Table 3 and Appendix I).  
20  
21  
22  
23  
24  
25  
26  
27  
28  
29  
30  
31  
32

### 33 **Prescription drug plan expenditures**

#### 34 *Overall findings*

35  
36  
37 The total number of publicly covered prescription and plan expenditures reimbursed by the  
38 benefits plan over the 46 months was \$1,421,248,106. As shown in Figure 2, there was an increased  
39 plan expenditure rate of \$115.94 per person per month after OHIP+ policy one implementation (95%  
40 CI \$100.93 to \$130.94) and a level drop of plan expenditure rate of -\$99.97 per person per month after  
41 OHIP+ modification (95% CI \$119.79 to -\$80.15). The estimated trend-change noted a slight monthly  
42 increase of \$0.03 per person per month (95% CI \$0.15 to \$0.20) with an opposite direction after  
43 modification. Compared to the stable BC utilization, publicly covered prescriptions plan expenditure in  
44 ON increased by 252%, from a mean of \$4,601 per 1,000 young people in the two years before OHIP+  
45 implementation, to \$16,202 per 1000 from January 2018 to April 2019, then decreased by 99% to  
46 \$1,606 per 1,000.  
47  
48  
49  
50  
51  
52  
53  
54  
55  
56  
57  
58  
59  
60

#### **Asthma and diabetes drug prescription expenditure**

1  
2  
3 As shown in Table 2, we found an immediate increase of plan expenditure rate of \$12.80 per  
4 person per month for asthma publicly covered prescription reimbursed dollars for by the benefits plans  
5 after the adoption of the first OHIP+ policy (95% CI \$10.85 to \$14.76). Subsequently an immediate  
6 plan expenditure drop of \$8.58 per person per month asthma publicly covered prescriptions reimbursed  
7 dollars after the second policy change (-\$8.58, 95% CI. -\$10.82 to -\$6.33). Following the first policy  
8 intervention, the estimated trend-change was \$0.039 per person per month (95% CI \$-\$0.23 to \$0.31).  
9  
10 For diabetes, drug-plan expenditure increased by \$7.32 per person per month after the adoption of  
11 OHIP+ (95% CI \$5.78 to \$8.86) and a level drop of plan expenditure of \$-3.75 per person per month  
12 after the program modification (95% CI \$-5.68 to \$-1.83). The estimated trend-change increased with  
13 \$1.86 per month (95% CI \$0.27 to \$3.46), and the trend after modifying OHIP+ was not statistically  
14 significant.  
15

16  
17 Many of the changes for asthma and diabetes public-drug plan expenditures were substantial,  
18 with reimbursements increasing by 100% or more and dropping for the overall and individual  
19 ingredients by 50% or more after the program modification (see Table 3). The largest increases for  
20 mean publicly covered prescription plan expenditure for asthma prescriptions was for omalizumab,  
21 mometasone, ipratropium, tiotropium, budesonide (above 900% change) and the largest declines were  
22 for Ivacafter and ipratropium (> 90% change). The largest increases for monthly mean for publicly  
23 covered prescription plan expenditure diabetes prescriptions was for empagliflozin, dapagliflozin,  
24 insulin glulisine (>800%) and the largest declines were for dapagliflozin, insulin detemir (> 70%  
25 change) (see Appendix I).  
26  
27  
28  
29  
30  
31  
32  
33  
34  
35  
36  
37  
38  
39  
40  
41  
42  
43  
44  
45  
46  
47

## 48 **Interpretation**

### 49 **Principal findings**

50  
51 When it was introduced, OHIP+ represented a major change in drug coverage in Canada. Our  
52 analysis found that both publicly covered prescriptions and costs in ON increased considerably by  
53 >70% pre-post OHIP+ adoption. Further, we found that the April 2019 change in the eligibility criteria  
54 substantially reduced this by >50%. We also found that the asthma and diabetes monthly rates for  
55  
56  
57  
58  
59  
60



1  
2  
3 publicly covered prescriptions and plan expenditures all reported an immediate significant increase after  
4  
5 OHIP+ implementation and a subsequent drop with the modification of the OHIP+ policy.  
6

7         The more generous universal drug coverage offered through the initial scope of OHIP+  
8  
9 increased access to publicly funded medicines. Our study aligns with others that have found that public  
10  
11 prescription-drug plans that provide non-catastrophic first-dollar coverage increase utilization of  
12  
13 publicly covered medication and lower rates of cost-related non-adherence.<sup>5-7,11,41</sup> Other studies have  
14  
15 shown that higher financial coverage promotes higher utilization and access to drugs among  
16  
17 populations.<sup>1,16,41</sup> In contrast, a more restrictive universal drug coverage model offers limited access and  
18  
19 mixed drug expenditure based on the payer.<sup>1,4,6,16</sup> These findings align with those from our study.  
20  
21

22         Due to data access limitations, we were unable to measure health outcomes across the time  
23  
24 periods of the study. This is crucial data to pursue, as improving health outcomes is the ultimate goal  
25  
26 of these policy changes. Several randomized trials have been undertaken in the United States and  
27  
28 Canada, to examine the health outcomes and adherence of patients provided free access to their  
29  
30 medications.<sup>41-44</sup> Overall, there was no improvement in health outcomes, but the recently published 2-  
31  
32 year follow-up of the CLEANMeds randomized trial involving Ontario patients with cost-related non-  
33  
34 adherence, showed improved adherence and reduced total healthcare costs over 2 years.<sup>42</sup> Further work  
35  
36 on the cost-effectiveness of a variety of drug coverage policies, is essential.<sup>42-44</sup> We are not aware of a  
37  
38 randomized trial examining free essential medications just for children and youth, arguable the group  
39  
40 likely to prove the most cost-effective given lower per person costs and longer life-years remaining.  
41  
42 Expanded financial coverage likely accounted for the increases in utilization of publicly covered  
43  
44 prescriptions found in our study.  
45  
46  
47  
48  
49

## 50 **Implications**

51         Findings from this study provide implications both for policy and future research. For policy,  
52  
53 our findings can be used to inform the ongoing discussions regarding a national universal pharmacare  
54  
55 program in Canada. Expanding coverage would increase access to prescription medicines (essential and  
56  
57 non-essential) and would likely reduce cost burdens on many individuals in lower socioeconomic strata,  
58  
59 but would increase costs for governments by an amount that appears to be predictable. Future research  
60

1  
2  
3 should focus on the associations of implementing and modifying OHIP+ with health outcomes, as this  
4  
5 would generate the crucial data for cost-effectiveness analysis.  
6  
7  
8

### 9 10 **Strength and limitations**

11 Our analysis has strengths and limitations worth noting. The main strength is the use of  
12 province-wide data to calculate utilization rates and plan expenditure, which provides a robust  
13 assessment of the impact of OHIP+ and its modification on these outcomes. The limitations for our  
14 study include selecting a small number of indicators, based on what was available through NPDUIS.  
15 Additionally, while we are unaware of any changes affecting plan beneficiary members around the time  
16 of the OHIP+ policy change, there is potential for bias in our estimates if such changes did occur and  
17 these confounders were not included in our models. It was also impossible to ascertain whether plan  
18 members had a private coverage plan, and the extent of coverage effects like stopping therapies  
19 altogether.  
20  
21  
22  
23  
24  
25  
26  
27  
28  
29  
30  
31  
32

### 33 **Conclusion**

34 Adopting a universal pharmacare (OHIP+) for Ontarians < 25 years of age increased  
35 considerably the number of publicly covered prescriptions and public expenditures with a decrease in  
36 both following the modification of the program. This study is useful to inform the debate over national  
37 pharmacare and largely confirmed the government predicted additional cost of OHIP+. Future research  
38 should focus on examining associations of implementing OHIP+ and changes in policy with health  
39 outcomes so that cost-effectiveness can be estimated.  
40  
41  
42  
43  
44  
45  
46  
47  
48  
49

### 50 **Acknowledgements**

#### 51 *Funding:*

52 Data was provided from CIHI NPDUIS through the Graduate Student Access Program (GSAP);  
53 therefore, no funding was required for this project.  
54  
55  
56  
57  
58  
59  
60

**Table 1: Sample characteristics of the ON population, ODB medication-related utilization and costs**

| Characteristic                                  | Period; no. (%) of observations                 |                                                  |                           |
|-------------------------------------------------|-------------------------------------------------|--------------------------------------------------|---------------------------|
|                                                 | Month pre-1 <sup>st</sup> policy<br>(Dec. 2017) | Month pre- 2 <sup>nd</sup> policy<br>(Mar. 2019) | Last month<br>(Oct. 2019) |
| Total no. beneficiaries                         | 81,556                                          | 559,044                                          | 251,218                   |
| Age                                             |                                                 |                                                  |                           |
| 0-17 years                                      | 46,626 (57.2)                                   | 307,056 (54.9)                                   | 134,224 (53.4)            |
| 18-25 years                                     | 34,930 (42.8)                                   | 251,988 (45.1)                                   | 116,994 (46.6)            |
| Sex                                             |                                                 |                                                  |                           |
| Male                                            | 39,943 (49.0)                                   | 240,835 (43.1)                                   | 111,545 (44.4)            |
| Female                                          | 40,612 (49.8)                                   | 317,954 (56.9)                                   | 139,467 (55.5)            |
| Other                                           | 1,001 (1.2)                                     | 255 (0.05)                                       | 206 (0.08)                |
| SES (Income quintile)                           |                                                 |                                                  |                           |
| Low (1).                                        | 33,964 (41.6)                                   | 108,218 (19.4)                                   | 68,372 (27.2)             |
| Low-middle (2)                                  | 18,119 (22.2)                                   | 102,359 (18.3)                                   | 51,718 (20.6)             |
| Middle (3)                                      | 12,407 (15.2)                                   | 109,887 (19.7)                                   | 46,292 (18.4)             |
| Middle-upper (4)                                | 8,962 (11.0)                                    | 114,927 (20.6)                                   | 41,896 (16.7)             |
| Upper (5)                                       | 6,452 (7.9)                                     | 117,608 (21.0)                                   | 38,995 (15.5)             |
| Prescriptions                                   |                                                 |                                                  |                           |
| Total prescriptions                             | 265,709                                         | 1,041,849                                        | 558,919                   |
| Overall plan cost                               | \$16,251,475                                    | 62,057,345                                       | 33,694,070                |
| Prescriptions (Asthma)                          |                                                 |                                                  |                           |
| Total prescriptions                             | 3,166                                           | 12,183                                           | 5,732                     |
| Overall plan costs.                             | \$259,015                                       | \$1,415,801                                      | \$560,200                 |
| Prescriptions (Diabetes)                        |                                                 |                                                  |                           |
| Total prescriptions                             | 20,715                                          | 108,300                                          | 54,919                    |
| Overall plan costs                              | \$ 722,872                                      | \$4,763,749                                      | \$2,179,416               |
| Rate of use per 1,000<br>Population aged <25 yr | 783 (0.78)                                      | 2,993 (2.99)                                     | 1,606 (1.61)              |

**Table 2: OHIP+ policy effects rate change in monthly ODB publicly covered prescriptions and plan expenditure volumes**

| Parameter (level & trend)         | Period; effects rate change in no. of observations (coefficient, 95%CI, P-value) |                                                           |
|-----------------------------------|----------------------------------------------------------------------------------|-----------------------------------------------------------|
|                                   | Period pre-post 1 <sup>st</sup> policy                                           | Period between 1 <sup>st</sup> and 2 <sup>nd</sup> policy |
| Overall prescriptions use & costs |                                                                                  |                                                           |
| Overall Prescription              |                                                                                  |                                                           |
| Level change.                     | 2.13 (1.89 - 2.37; P < 0.001)                                                    | -1.610 (-1.95 - -1.26; p< 0.001)                          |
| Trend change.                     | 0.01 (-0.02 - 0.03; p < 0.055).                                                  | 0.003 (-0.07 - 0.07; p < 0.9321)                          |
| Overall Plan costs                |                                                                                  |                                                           |
| Level change.                     | \$115.94(100.93-130.94; P<0.001)                                                 | \$-99.97 (-119.79 - -80.14 p< 0.001)                      |
| Trend change.                     | \$1.86 (-0.27-3.46; p<0.025).                                                    | \$-0.64 (-3.70 - 4.98; p < 0.773)                         |
| Asthma (A10)                      |                                                                                  |                                                           |
| Overall prescription              |                                                                                  |                                                           |
| Level change.                     | 0.27 (0.20-0.35; p < 0.001)                                                      | -0.161 (-0.24 - - 0.08; P < 0.001)                        |
| Trend change                      | 0.0002 (-0.11 -0.01; p < 0.978.                                                  | 0.0008 (-0.03 - 0.02; P < 0.948)                          |

|                      |                                   |                                     |
|----------------------|-----------------------------------|-------------------------------------|
| Overall plan costs   |                                   |                                     |
| Level change.        | \$12.80 (10.85 – 14.76; p<0.001)  | \$-8.58 (-10.82 - -6.33; P < 0.001) |
| Trend change         | \$0.039 (-0.23 – 0.31); P < 0.001 | \$0.1781 (-0.44 – 0.80; P < 0.574)  |
| Diabetes (A10)       |                                   |                                     |
| Overall Prescription |                                   |                                     |
| Level change.        | 0.03 (2.35- 3.40; P< 0.001)       | -0.02 (-2.84 - -1.49; p< 0.001)     |
| Trend change.        | 0.0002 (-4.02-7.43; p<0.5619)     | -0.0004 (-1.15-1.91; p <0.6288)     |
| Overall Plan costs   |                                   |                                     |
| Level change.        | \$7.32 (5.78-8.86; P< 0.001)      | \$-3.75 ( -5.68 - -1.83; p< 0.001)  |
| Trend change.        | \$0.03 (-0.15 - 0.20; p<0.078)    | \$-0.04 (-0.42 - 0.49; p <0.873)    |

**Table 3: Top changes in terms of the largest increase and reduction in publicly covered prescription and plan expenditure volumes following the adoption and modification of OHIP+**

| Ingredients                             | Drug utilization pre-post OHIP+ Policy 1 (adoption phase) |                  |                   | Drug utilization pre-post OHIP+ policy 2 (modification phase) |                   |
|-----------------------------------------|-----------------------------------------------------------|------------------|-------------------|---------------------------------------------------------------|-------------------|
|                                         | Parameter                                                 | Pre index (Nos.) | Post index (Nos.) | % Change from Pre-index                                       | Post index (Nos.) |
| Total no. of beneficiaries              | 1,864,796                                                 | 8,314,971        | +613%             | 1,822,971                                                     | -53%              |
| Overall prescriptions                   | 6,126,278                                                 | 15,280,827       | +299%             | 3,462,439                                                     | -52%              |
| Rate of pres. use per 1000              | 756                                                       | 2,952            | +74%              | 1,421                                                         | -52%              |
| Overall plan costs                      | \$378,864,749                                             | \$838,556,189    | +254%             | \$203,827,168                                                 | -49%              |
| Rate of cost per 1000                   | \$4,602                                                   | \$16,202         | +252%             | \$1,606                                                       | -99%              |
| <b>Drug Prescription use (asthma)</b>   | 408,517                                                   | 1,617,430        | +534%             | 307,354                                                       | -59%              |
| R03DX05 -Omalizumab                     | 28                                                        | 2,704            | +17900%           | 552                                                           | -56%              |
| R03BA07 -Mometasone                     | 51                                                        | 1,369            | +4450%            | 46                                                            | -92%              |
| R01AD05 -Budesonide                     | 8,632                                                     | 47,245           | +775%             | 11,194                                                        | -49%              |
| R03AK09 -Formoterol & mometasone        | 3,733                                                     | 18,618           | +696%             | 3,513                                                         | -60%              |
| <b>Drug prescription use (diabetes)</b> | 69,598                                                    | 172,492          | +297%             | 36,471                                                        | -55%              |
| Rate of use per 1000                    | 9                                                         | 33               | +288%             | 15                                                            | -55%              |
| A10BK03 - Empagliflozin                 | 98                                                        | 1,596            | +2500%            | 655                                                           | -12%              |
| A10AB06 - Insulin Glusine               | 340                                                       | 1,818            | +764%             | 318                                                           | -63%              |
| A10BD07 - Metformin & Sitagliptin       | 1,270                                                     | 2,731            | +244%             | 1,106                                                         | -13%              |
| <b>Drug plan expenditure (asthma)</b>   | \$15,731,734                                              | \$67,238,150     | +584%             | \$12,598,120                                                  | -20%              |
| Rate of use per 1000                    | \$1,940                                                   | \$12,990         | +570%             | \$4,548                                                       | -64%              |
| R03DX05 - Omalizumab                    | \$41,642                                                  | \$4,183,232      | +15974%           | \$765,228                                                     | -61%              |
| R03BB01- Ipratropium                    | \$25720                                                   | \$6827           | +9452%            | \$17,331                                                      | -98%              |
| R03BA07 - Mometasone                    | \$2,456                                                   | \$75,830         | +4856%            | \$2,344                                                       | -93%              |
| <b>Drug expenditure (diabetes)</b>      | \$15,731,734                                              | \$67,238,150     | +584%             | \$12,598,120                                                  | -20%              |
| Rate of use per 100,0                   | \$716                                                     | \$3584           | +410%             | \$1489                                                        | -62%              |
| A10BK03 - Empagliflozin                 | \$8,785                                                   | \$176536         | +3100%            | \$56926                                                       | -31%              |
| A10BK01- Dapagliflozin                  | \$3,856                                                   | \$51501          | +2032%            | \$5075                                                        | -79%              |

|                           |          |          |       |         |      |
|---------------------------|----------|----------|-------|---------|------|
| A10AB06 - Insulin Glusine | \$28,803 | \$173455 | +864% | \$32635 | -60% |
|---------------------------|----------|----------|-------|---------|------|

Figures 1-2.

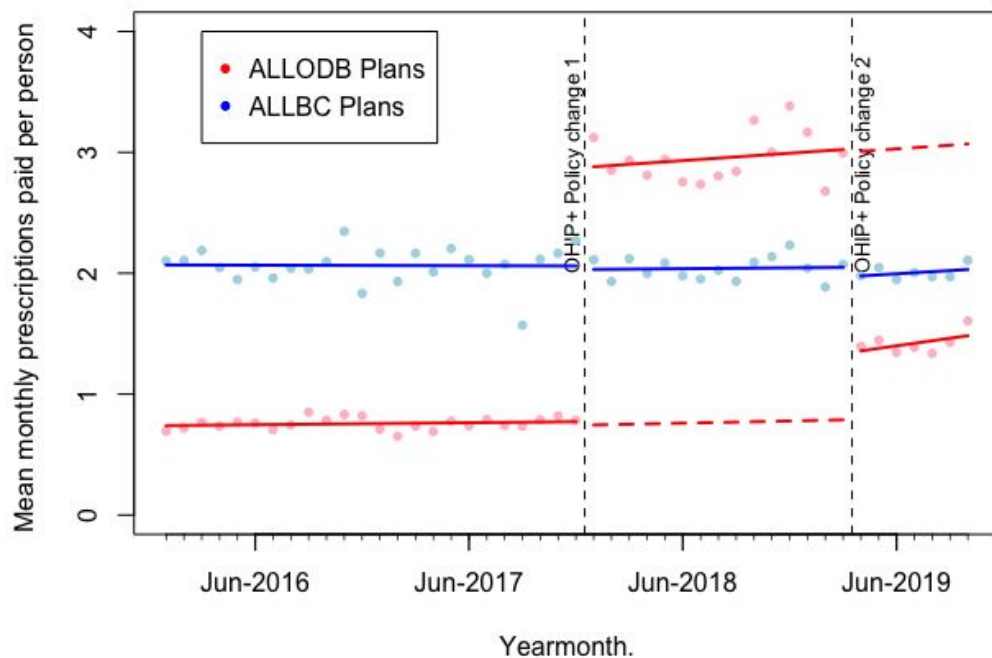

Figure 1: Average monthly number of publicly covered prescriptions per person per population where at least a portion was paid by the benefits plan, before and after the first and second OHIP+ policy intervention changes in January 2018 and in April 2019. The solid lines represent the estimated monthly rates and dashed lines (counterfactual), predicated estimates.

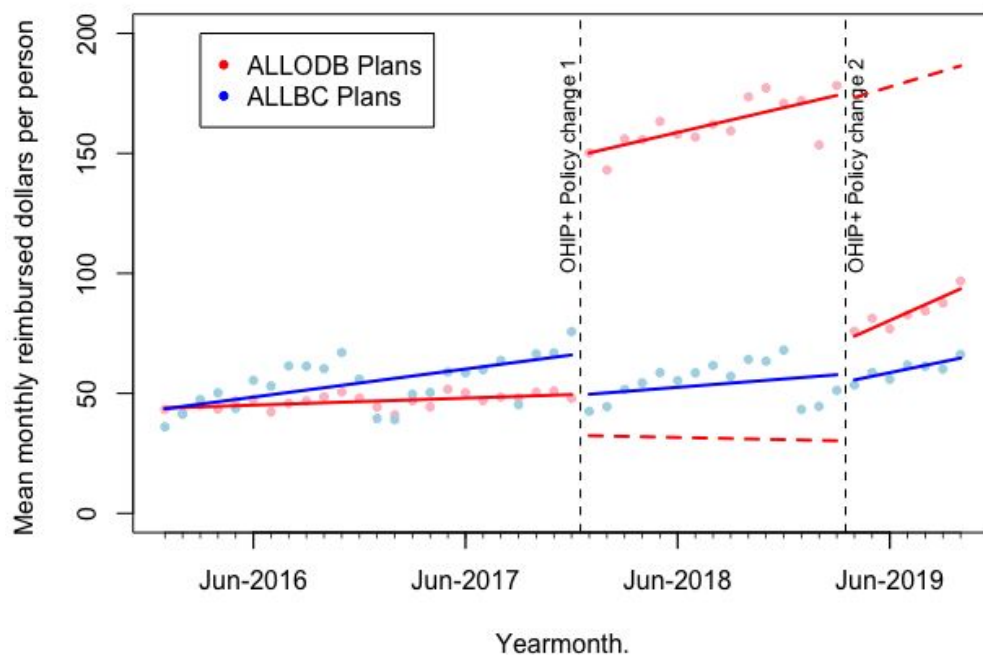

Figure 2: Interrupted time-series analysis of overall reimbursed dollars per person per population before and after the first and second OHIP+ policy intervention changes in January 2018 and in April 2019. The solid lines represent the estimated monthly rates and dashed lines (counterfactual), predicated estimates.

#### References:

1. Bigdeli M, Peters D, Wagner A, editors. Medicines in health systems: advancing access, affordability and appropriate use. Geneva: World Health Organization; 2014.
2. Royal Commission on Health Services. Ottawa: Queen's Printer; 1964.
3. Romanow RJ. Building on values: the future of health care in Canada — final report. Saskatoon: Commission on the Future of Health Care in Canada; 2002.
4. Prescription drug access and affordability an issue for nearly a quarter of all Canadian households. Vancouver: Angus Reid Institute; 2015.
5. Law MR, Cheng L, Dhalla IA, et al. The effect of cost on adherence to prescription medications in Canada. *CMAJ* 2012; 184:297-302.
6. Goldman DP, Joyce GF, Zheng Y. Prescription drug cost sharing: associations with medication and medical utilization and spending and health. *JAMA* 2007; 298:61-9.
7. Tamblyn R, Laprise R, Hanley JA, et al. Adverse events associated with prescription drug cost-sharing among poor and elderly persons. *JAMA* 2001;285: 421-9.
8. Gagnon MA. A roadmap to a rational pharmacare policy in Canada. Ottawa: Canadian Federation of Nurses Unions; 2014.
9. OECD health statistics 2016. Paris: Organisation for Economic Co-operation and Development; 2016.
10. Lexchin J. Drug pricing in Canada. In: Babar ZUD, editor. Pharmaceutical prices in the 21st century. Cham (Switzerland): Springer International Publishing AG; 2015:25-41.
11. Morgan SG, Martin D, Gagnon MA, et al. Pharmacare 2020: The future of drug coverage in Canada. Vancouver: Pharmaceutical Policy Research Collaboration; 2015.
12. Morgan SG, Gagnon MA, Mintzes B, et al. A better prescription: advice for a national strategy on pharmaceutical policy in Canada. *Healthc Policy* 2016; 12:18-36.
13. Morgan SG, Boothe K. Universal prescription drug coverage in Canada: long promised yet undelivered. *Healthc Manage Forum* 2016; 29:247-54.
14. Wirtz VJ, Hogerzeil HV, Gray AL, et al. Essential medicines for universal health coverage. *Lancet* 2016 Nov. 4 [Epub ahead of print]. doi:10.1016/S0140-6736 (16) 3.
15. World Health Organization. Making fair choices on the path to universal health coverage. Geneva: WHO; 2014.
16. Kesselheim AS, Huybrechts KF, Choudhry NK, et al. Prescription drug insurance coverage and patient health outcomes: a systematic review. *Am J Public Health* 2015;105: e17-30.
17. Daw JR, Morgan SG. Stitching the gaps in the Canadian public drug coverage patchwork? A review of provincial pharmacare policy changes from 2000 to 2010. *Health Policy* 2012; 104:19-26.
18. O'Keeffe AG, Geneletti S, Baio G. et al. 2014. Regression discontinuity designs: an approach to the evaluation of treatment efficacy in primary care using observational data. *British Medical Journal* 349: g5293–g5293.

19. Moscoe E, Bor J, Bārnighausen T. 2015. Regression discontinuity designs are underutilized in medicine, epidemiology, and public health: a review of current and best practice. *Journal of Clinical Epidemiology*, 68: 132–43.
20. Wagner AK, Soumerai SB, Zhang F, Ross-Degnan D. 2002. Segmented regression analysis of interrupted time series studies in medication use research. *Journal of Clinical Pharmacy and Therapeutics* 27: 299–309.
21. Zhang F, Wagner AK, Soumerai SB, Ross-Degnan D. 2009. Methods for estimating confidence intervals in interrupted time series analyses of health interventions. *Journal of Clinical Epidemiology* 62: 143–8.
22. Khraishi, M., Ivanovic, J., Zhang, Y. et al. 2018. Long-term etanercept retention patterns and factors associated with treatment discontinuation: a retrospective cohort study using Canadian claims-level data. *Clin Rheumatol* 37: 2351.
23. Society C. Pharmacare in Canada: The Paediatric Perspective [Internet]. Cps.ca. 2019 [cited 5 January 2020]. Available from: <https://www.cps.ca/en/documents/position/pharmacare>
24. Canada H. Prescription drug insurance coverage - Canada.ca [Internet]. Canada.ca. 2018 [cited 3 January 2020]. Available from: <https://www.canada.ca/en/health-canada/services/health-care-system/pharmaceuticals/access-insurance-coverage-prescription-medicines.html>
25. Ungar WJ, Witkos M. Public drug plan coverage for children across Canada: a portrait of too many colours. *Healthcare Policy*. 2005 Sep;1(1):100.
26. OHIP+: Children and Youth Pharmacare - Drugs and Devices - Health Care Professionals - MOHLTC [Internet]. Health.gov.on.ca. 2019 [cited 4 January 2020]. Available from: <http://www.health.gov.on.ca/en/pro/programs/drugs/ohipplus/>
27. Free Prescription Medication for Children and Youth [Internet]. news.ontario.ca. 2017 [cited 4 January 2020]. Available from: <https://news.ontario.ca/opo/en/2017/05/free-prescription-medication-for-children-and-youth.html>
28. Ontario - Ministry of Health and Long-Term Care Drug and Devices Division. Amendment to Ontario Regulation 201/96 made under the Ontario Drug Benefit Act to make changes to Ontario Drug Benefit Program coverage for children and youth aged 24 years and under (OHIP+). Government of Ontario; 2019.
29. Benefits Hub. 2019 [cited 4 January 2020]. Available from: <https://plus.telushealth.co/blogs/health-benefits/en/2019-drug-data-trends-national-benchmarks-report/>
30. Cook, TD, Campbell, DT (1979) Quasi-experimentation. Design & analysis issues for field settings. Boston, MA: Houghton Mifflin Company.
31. Gillings, D, Makuc, D, Siegel, E (1981) Analysis of interrupted time series mortality trends: an example to evaluate regionalized perinatal care. *American Journal of Public Health*, 71, 38–46.
32. Parulekar AD, Alobaidy A, Hanania NA. Asthma outcomes revisited. *Curr Opin Pulm Med*. 2013; 19(1): 6- 12.
33. Florida Asthma Coalition. Burden of Asthma in Florida 2008-2010. Tallahassee, FL: Florida Department of Public Health; 2015.

- 1  
2  
3  
4  
5  
6  
7  
8  
9  
10  
11  
12  
13  
14  
15  
16  
17  
18  
19  
20  
21  
22  
23  
24  
25  
26  
27  
28  
29  
30  
31  
32  
33  
34  
35  
36  
37  
38  
39  
40  
41  
42  
43  
44  
45  
46  
47  
48  
49  
50  
51  
52  
53  
54  
55  
56  
57  
58  
59  
60
34. Liptzin DR, Szeffler SJ. Evolution of asthma self-management programs in adolescents: from the crisis plan to Facebook. *J Pediatr*. 2016; **179**: 19- 23.
  35. Overview of steps.2020 [cited 30<sup>th</sup> September 2020]. Available from: <https://learning.edx.org/course/course-v1:UBCx+ITSx+1T2017/block-v1:UBCx+ITSx+1T2017+type@sequential+block@d69502a5d3f54ca2981a6ca6f581f130/blockv1:UBCx+ITSx+1T2017+type@vertical+block@d0bd45f7886d4f2b9aa47fcf87af169b>
  36. Shatin D, Gardner JS, Stergachis A, et al. impact of mailed warning to prescribers on the co-prescription of tramadol and antidepressants. *Pharmacoepidemiol Drug Saf* 2005;14:149-54.
  37. Smalley W, Shatin D, Wysowski DK, et al. Contraindicated use of cisapride: impact of Food and Drug Administration regulatory action. *JAMA* 2000;284:3036-9.
  38. Huskamp HA, Deverka PA, Epstein AM, et al. The effect of incentive-based formularies on prescription-drug utilization and spending. *N Engl J Med* 2003;349:2224-32.
  39. Huskamp HA, Epstein AM, Blumenthal D. The impact of a national prescription drug formulary on prices, market share, and spending: lessons for Medicare? *Health Aff (Millwood)* 2003;22:149-58.
  40. Soumerai SB. Benefits and risks of increasing restrictions on access to costly drugs in Medicaid. *Health Aff (Millwood)* 2004;23:135-46.
  41. Holbrook AM, Wang M, Lee M, Law RL. Cost-related medication nonadherence in Canada: a systematic review of prevalence, predictors, and clinical impact. *BMC* 2021; **10:11**
  42. Persaud N, Bedard M, Boozary AS, Glazier RH, Gomes T, Hwang SW, et al. Effect on treatment adherence of distributing essential medicines at no charge: the CLEAN Meds Randomized Clinical Trial. *JAMA Intern Med*. 2020; 180(1):27–34
  43. Wang TY, Kaltenbach LA, Cannon CP, Fonarow GC, Choudhry NK, Henry TD, et al. Effect of medication co-payment vouchers on P2Y12 inhibitor use and major adverse cardiovascular events among patients with myocardial infarction: the ARTEMIS randomized clinical trial effect of co-payment vouchers on antiplatelet adherence and CVD events effect of co-payment vouchers on antiplatelet adherence and CVD events. *JAMA*. 2019;321(1):44–55.
  44. Krol BL. The effect of free distribution of essential medicines on adherence by income sources and level. Toronto: University of Toronto; 2019.



## Appendix I

**Table S1: Data elements for studying the OHIP+ trends of publicly covered prescription utilization and expenditures**

| Data Element                                                           | Definition                                                                                                                                                                                                                                                                                                                                                                                                         |
|------------------------------------------------------------------------|--------------------------------------------------------------------------------------------------------------------------------------------------------------------------------------------------------------------------------------------------------------------------------------------------------------------------------------------------------------------------------------------------------------------|
| Calendar Year/month                                                    | The calendar year and month during which a claim was dispensed.                                                                                                                                                                                                                                                                                                                                                    |
| Province                                                               | The provincial/jurisdiction responsible for financing the claim: <ul style="list-style-type: none"> <li>• Ontario (ON)</li> <li>• British Columbia (BC)</li> </ul>                                                                                                                                                                                                                                                 |
| Program Group                                                          | See Plans and Programs in the NPDUIS Database section for more detail<br>A drug benefits plan/program to which the claim was submitted for payment.                                                                                                                                                                                                                                                                |
| Neighborhood Income Quintile                                           | A grouping by the neighborhood income quintile (based on national distribution) associated with patient postal code. That is, Quintile 1 (Lowest income), 2, 3, 4, 5 (Highest Income), and 9 (Missing).                                                                                                                                                                                                            |
| Patient Sex                                                            | The sex of the patient at the time of claim, and grouped as male, female, other.                                                                                                                                                                                                                                                                                                                                   |
| Patient Age Category                                                   | The age of the patient at the time of claim (service date), grouped as 0-17, 18-25.                                                                                                                                                                                                                                                                                                                                |
| ATC level 5 code/description (only for diabetic and respiratory drugs) | An ATC code and English description is defined by the WHO Collaborative Centre for Drug Statistics Methodology and is assigned by Health Canada at the product level. Chemical substance — indicated by the full 7 characters of the ATC code.                                                                                                                                                                     |
| PDIN flag (only for diabetic and respiratory drugs)                    | A flag that indicates whether the product is listed as a pseudo-drug identification number (PDIN). The drug identification number (DIN) or pseudo-DIN (PDIN) identifies drug products sold in a dosage form in Canada. DINs are assigned by Health Canada, and PDINs are assigned by the plan/program.<br>If the PDIN Flag is Y, the value received is a PDIN. If the PDIN Flag is N, the value received is a DIN. |

|                                                                   |                                                                                                                                                                                                                                                                                                                                                                                                                                                                                                                                                        |
|-------------------------------------------------------------------|--------------------------------------------------------------------------------------------------------------------------------------------------------------------------------------------------------------------------------------------------------------------------------------------------------------------------------------------------------------------------------------------------------------------------------------------------------------------------------------------------------------------------------------------------------|
| Form (only for diabetic and respiratory drugs)                    | A pharmaceutical dosage form description of drug products used within the CIHI database. It is derived from the Health Canada dosage form and modified using predetermined form-mapping rules to ensure standard reporting. For more information, see the CIHI Pharmaceutical Form Mapping<br>For PDINs, this data element will be reported as blank.<br><br>( <a href="https://www.cihi.ca/en/system/files/document/pharmaceutical_mapping2008_en.pdf">https://www.cihi.ca/en/system/files/document/pharmaceutical_mapping2008_en.pdf</a> ) document. |
| Route of administration (only for diabetic and respiratory drugs) | The route of administration for the drug as reported in Health Canada Drug product Database.<br>For PDINs, this data element will be reported as blank.                                                                                                                                                                                                                                                                                                                                                                                                |
| Strength (only for diabetic and respiratory drugs)                | Standardized strength of a DIN for use in establishing the CIHI Uniform Description.                                                                                                                                                                                                                                                                                                                                                                                                                                                                   |

|                                       |                                                                                                                                                                                                |
|---------------------------------------|------------------------------------------------------------------------------------------------------------------------------------------------------------------------------------------------|
| # of Claims Accepted                  | The number of claims where the public plan/program accepted at least part of the claim, either toward a deductible (if applicable) or for payment for the given drug class.                    |
| # of Active Beneficiaries             | The number of people from whom the public plan/program has accepted at least part of at least one claim for the given drug class, either toward a deductible (if applicable) or for payment.   |
| # of Paid Beneficiaries               | The number of people for whom the public plan/program paid at least part of at least 1 claim for the given drug class.                                                                         |
| Program Paid Amount                   | The Amount from the total prescription cost accepted that is paid by the plan/program for the given drug class.                                                                                |
| # of active beneficiaries (all drugs) | The number of individuals from whom the public plan/program has accepted at least part of at least one claim, either toward a deductible (if applicable) or for payment, for any drug product. |
| # of paid beneficiaries (all drugs)   | The number of people for whom the public plan/program paid at least part of at least 1 claim for any drug product.                                                                             |
| # of Claims Accepted (all drugs)      | The number of claims where the public plan/program accepted at least part of the claim, either toward a deductible (if applicable) or for payment any drug.                                    |
| Program Paid Amount (all drugs)       | The Amount from the total prescription cost accepted is paid by the plan/program for any drug product.                                                                                         |

**Table S2: Top changes in asthma publicly covered prescription use volumes and plan expenditures pre-post policy changes**

| Ingredient-parameter                | Period; no. of prescriptions and costs (monthly mean, %) change |                              |          |                              |          |
|-------------------------------------|-----------------------------------------------------------------|------------------------------|----------|------------------------------|----------|
|                                     | Before 1 <sup>st</sup> policy                                   | After 1 <sup>st</sup> policy | % change | After 2 <sup>nd</sup> policy | % change |
| Total no. beneficiaries             | 1864796 (77700)                                                 | 8314971(554331)              | +613.4   | 1822971 (260424)             | -53.0    |
| Prescriptions                       |                                                                 |                              |          |                              |          |
| Overall prescriptions               | 6126278 (255262)                                                | 15280827 (1018722)           | +299.1   | 3462439 (494634)             | -51.5    |
| Rate of use per 1000                | 756 (0.756)                                                     | 2952 (2.952)                 |          | 1421 (1.421)                 |          |
| Overall plan costs                  | \$378864749 (15786031)                                          | \$838556189(55903746)        | +254.1   | \$203827168(29118167)        | -47.9    |
| Rate of cost per 1000               | \$162018 (46.02)                                                | \$162018 (162.02)            |          | \$1606 (1.61)                |          |
| Prescriptions (Asthma)              |                                                                 |                              |          |                              |          |
| Overall prescriptions               | 408517 (17022)                                                  | 1617430 (107829)             | +533.5   | 307354 (43908)               | -59.3    |
| Rate of use per 1000                | 50.5 (0.050395126)                                              | 313 (0.312504528)            |          | 26.2 (0.12614199)            |          |
| Beclomethasone-R01AD01              | 6149 (256)                                                      | 18237(1216)                  | +375     | 4152 (593)                   | -51.2    |
| Beclometasone-R03BA01               | 3790 (158)                                                      | 15457 (1030)                 | +551.9   | 2204 (315)                   | -69.4    |
| Budesonide-R01AD05                  | 8632 (360)                                                      | 47245 (3150)                 | +775     | 11194 (1599)                 | -49.2    |
| Budesonide-R03BA02                  | 3526 (147)                                                      | 9673 (645)                   | +338.8   | 1577 (225)                   | -65.1    |
| Fluticasone-R03BA05                 | 90672 (3778)                                                    | 417072 (27805)               | +636     | 66651 (9522)                 | -65.8    |
| Ciclesonide-R01AD13                 | 36516 (1522)                                                    | 64866 (4324)                 | +184.1   | 34324 (4903)                 | -13.3    |
| Ciclesonide-R03BA08                 | 9176 (382)                                                      | 39957 (2664)                 | +597.4   | 5190 (741)                   | -72.2    |
| Mometasone-R03BA07                  | 51 (2)                                                          | 1369 (91)                    | +4450    | 46 (7)                       | -92.3    |
| Salbutamol-R03AC02                  | 183504 (7646)                                                   | 783621 (52241)               | +585     | 133055 (19008)               | -12.5    |
| Terbutaline-R03AC03                 | 1420 (59)                                                       | 6233 (416)                   | +605.1   | 815 (116)                    | -72.1    |
| Salmeterol and Fluticasone R03AK06  | 11039 (460)                                                     | 30282 (2019)                 | +338.9   | 5265 (752)                   | -62.8    |
| Vilanterol and Fluticasone- R03AK10 | 617 (26)                                                        | 7921 (528)                   | +1930.7  | 1635 (234)                   | -55.7    |
| Formoterol and Budesonide-R03AK07   | 8863 (369)                                                      | 37085 (2472)                 | +569.9   | 7593 (1085)                  | -56.1    |
| Formoterol&Mometasone-R03AK09       | 3733(156)                                                       | 18618 (1241)                 | +695.5   | 3513 (502)                   | -59.5    |

|    |  |  |  |  |  |  |
|----|--|--|--|--|--|--|
| 1  |  |  |  |  |  |  |
| 2  |  |  |  |  |  |  |
| 3  |  |  |  |  |  |  |
| 4  |  |  |  |  |  |  |
| 5  |  |  |  |  |  |  |
| 6  |  |  |  |  |  |  |
| 7  |  |  |  |  |  |  |
| 8  |  |  |  |  |  |  |
| 9  |  |  |  |  |  |  |
| 10 |  |  |  |  |  |  |
| 11 |  |  |  |  |  |  |
| 12 |  |  |  |  |  |  |
| 13 |  |  |  |  |  |  |
| 14 |  |  |  |  |  |  |
| 15 |  |  |  |  |  |  |
| 16 |  |  |  |  |  |  |
| 17 |  |  |  |  |  |  |
| 18 |  |  |  |  |  |  |
| 19 |  |  |  |  |  |  |
| 20 |  |  |  |  |  |  |
| 21 |  |  |  |  |  |  |
| 22 |  |  |  |  |  |  |
| 23 |  |  |  |  |  |  |
| 24 |  |  |  |  |  |  |
| 25 |  |  |  |  |  |  |
| 26 |  |  |  |  |  |  |
| 27 |  |  |  |  |  |  |
| 28 |  |  |  |  |  |  |
| 29 |  |  |  |  |  |  |
| 30 |  |  |  |  |  |  |
| 31 |  |  |  |  |  |  |
| 32 |  |  |  |  |  |  |
| 33 |  |  |  |  |  |  |
| 34 |  |  |  |  |  |  |
| 35 |  |  |  |  |  |  |
| 36 |  |  |  |  |  |  |
| 37 |  |  |  |  |  |  |
| 38 |  |  |  |  |  |  |
| 39 |  |  |  |  |  |  |
| 40 |  |  |  |  |  |  |
| 41 |  |  |  |  |  |  |
| 42 |  |  |  |  |  |  |
| 43 |  |  |  |  |  |  |
| 44 |  |  |  |  |  |  |
| 45 |  |  |  |  |  |  |
| 46 |  |  |  |  |  |  |
| 47 |  |  |  |  |  |  |
| 48 |  |  |  |  |  |  |
| 49 |  |  |  |  |  |  |
| 50 |  |  |  |  |  |  |
| 51 |  |  |  |  |  |  |
| 52 |  |  |  |  |  |  |
| 53 |  |  |  |  |  |  |
| 54 |  |  |  |  |  |  |
| 55 |  |  |  |  |  |  |
| 56 |  |  |  |  |  |  |
| 57 |  |  |  |  |  |  |
| 58 |  |  |  |  |  |  |
| 59 |  |  |  |  |  |  |
| 60 |  |  |  |  |  |  |

**Table S3: Top changes in diabetes publicly covered prescription use volumes and plan expenditure pre-post policy changes**

| Ingredient-parameter            | Period: no. of prescriptions and costs (%) change |                              |          |                              |          |
|---------------------------------|---------------------------------------------------|------------------------------|----------|------------------------------|----------|
|                                 | Before 1 <sup>st</sup> policy                     | After 1 <sup>st</sup> policy | % change | After 2 <sup>nd</sup> policy | % change |
| <b>Total no. beneficiaries</b>  | 1864796 (77700)                                   | 8314971(554331)              | +613.4   | 1822971 (260424)             | -53.0    |
| <b>Prescriptions</b>            |                                                   |                              |          |                              |          |
| Overall prescriptions           | 6126278 (255262)                                  | 15280827 (1018722)           | +299.1   | 3462439 (494634)             | -51.5    |
| Rate of use per 1000            | 756 (0.756)                                       | 2952 (2.952)                 |          | 1421 (1.421)                 |          |
| Overall plan costs              | \$378864749(15786031)                             | \$838556189(55903746)        | +254.1   | \$203827168 (29118167)       | -47.9    |
| Rate of cost per 1000           | \$46020 (46.02)                                   | \$162018 (162.02)            |          | \$1606 (1.61)                |          |
| <b>Prescriptions (Diabetes)</b> |                                                   |                              |          |                              |          |
| Overall prescriptions           | 69598 (2900)                                      | 172492 (11499)               | +296.5   | 36471 (5210)                 | -54.7    |
| Rate of use per 1000            | 8.58 (0.00858)                                    | 33.3 (0.03333)               |          | 14.9 (0.01497)               |          |
| <b>Insulin (A10A)</b>           | 5391841 (224660)                                  | 17459280 (1163952)           | +418.1   | 3297138 (471020)             | -59.5    |

|    |                              |                    |                       |         |                     |       |
|----|------------------------------|--------------------|-----------------------|---------|---------------------|-------|
| 1  |                              |                    |                       |         |                     |       |
| 2  |                              |                    |                       |         |                     |       |
| 3  | Insulin Aspart -A10AB05      | 18554 (773)        | 57313 (3821)          | +394.3  | 8863 (1266)         | -66.9 |
| 4  | Insulin Glargine - A10AE04.  | 12159 (507)        | 29401 (1960)          | +286.6  | 5192 (742)          | -62.1 |
| 5  | Insulin Lispro -A10AB04      | 10605 (442)        | 31924 (2128)          | +381.4  | 5214 (745)          | -65.0 |
| 6  | Insulin(humansusp)-          | 5311 (221)         | 7645 (510)            | +130.8  | 1239 (177)          | -65.3 |
| 7  | A10AC01                      |                    |                       |         |                     |       |
| 8  |                              |                    |                       |         |                     |       |
| 9  | Insulin Glulisine - A10AB06  | 340 (14)           | 1818 (121)            | +764.3  | 318 (45)            | -62.8 |
| 10 | Insulin Detemir- A10AE05     | 3576 (149)         | 6128 (409)            | +174.5  | 840 (120)           | -70.7 |
| 11 | <b>Blood GL meds- (A10B)</b> | 414747 (17281)     | 1092027 (72802)       | +321.3  | 330960 (47280)      | -35.1 |
| 12 | Metformin-A10BA02            | 14232 (593)        | 25542 (1703)          | +187.2  | 8727 (1247)         | -26.8 |
| 13 | Metformin sitagliptin-       | 1270 (53)          | 2731 (182)            | +243.4  | 1106 (158)          | -13.2 |
| 14 | A10BD07                      |                    |                       |         |                     |       |
| 15 |                              |                    |                       |         |                     |       |
| 16 | Glaclazide-A10BB09           | 1341 (56)          | 2034 (136)            | +142.9  | 892 (127)           | -6.6  |
| 17 | Sitagliptin-A10BH01.         | 954 (40)           | 1116 (74)             | +85.0   | 429 (61)            | -17.6 |
| 18 | Canagliflozin-A10BK02        | 1072 (45)          | 906 (60)              | +33.0   | 211 (30)            | -50.0 |
| 19 | empagliflozin-A10BK03.       | 98 (4)             | 1596 (106)            | +2500   | 655 (94)            | -11.3 |
| 20 | teststrips-Z99AA             | 36029 (1501)       | 87831 (5855)          | +290.1  | 14272 (2039)        | -65.2 |
| 21 | Overall plan costs.          | \$5806588 (241941) | \$18551307 (1236754)  | +411.2  | \$3628098 (518300)  | -58.1 |
| 22 | Rate of use per 1000         | \$716.31 (0.71631) | \$3584.3(3,58431)     |         | \$1489.02 (1.48902) |       |
| 23 | <b>Insulin (A10A)</b>        | \$5391841 (224660) | \$ 17459280 (1163952) | +418.1  | \$3297138 (471020)  | -59.5 |
| 24 | Insulin aspart -A10AB05      | \$1804849 (75202)  | \$6758411 (450561)    | +499.1  | \$1066830 (152404)  | -66.2 |
| 25 | Insulin Glargine - A10AE04   | \$1641723 (68405)  | \$4570759 (304717)    | +345.5  | \$824965 (117852)   | -61.3 |
| 26 |                              |                    |                       |         |                     |       |
| 27 | Insulin lispro -A10AB04      | \$924483 (38520)   | \$3513537 (234236)    | +508.1  | \$588106 (84015)    | -64.1 |
| 28 | Insulin(humansusp)-          | \$379536 (15814)   | \$615104 (41007)      | +159.3  | \$103675 (14811)    | -63.9 |
| 29 | A10AC01                      |                    |                       |         |                     |       |
| 30 | Insulin detemir- A10AE05     | \$606615 (25276)   | \$1135139 (75676)     | +199.4  | \$157560 (22509)    | -70.3 |
| 31 |                              |                    |                       |         |                     |       |
| 32 | Insulin Glulisine - A10AB06  | \$28803 (1200)     | \$173455 (11564)      | +863.7  | \$32635 (4662)      | -59.7 |
| 33 | BGLM - A10B                  | \$414747 (17281)   | \$1092027 (72802)     | +321.3  | \$330960 (47280)    | -35.1 |
| 34 | Metformin-A10BA02            | \$122944 (5123)    | \$252900 (16860)      | +229.1  | \$71455 (10208)     | -39.5 |
| 35 | Metformin-sitagliptin-       | \$112213 (4676)    | \$325714 (21714)      | +364.3  | \$115665 (16524)    | -23.9 |
| 36 | A10BD07                      |                    |                       |         |                     |       |
| 37 |                              |                    |                       |         |                     |       |
| 38 | Glaclazide-A10BB09           | \$14298 (596)      | \$21832 (1455).       | +144.1  | \$8306 (1187)       | -18.4 |
| 39 | Sitagliptin-A10BH01.         | \$ 81059(3377)     | \$ 156011 (10401)     | +207.9  | \$50930 (7276)      | -30.1 |
| 40 | Canagliflozin-A10BK02        | \$70096 (2921)     | \$89951 (5997)        | +105.3  | \$18797 (2685)      | -55.2 |
| 41 | Empagliflozin-A10BK03.       | \$8785 (366)       | \$176536 (11769)      | +3100.2 | \$56926 (8132)      | -30.9 |
| 42 | Dapagliflozin-A10BK01        | \$3856 (161)       | \$51501 (3433)        | +2032.2 | \$5075 (725)        | -78.9 |
| 43 | Teststrips-Z99AA             | \$4513868 (188078) | \$13466558 (897771)   | +377.3  | \$2063280 (294754)  | -67.2 |
| 44 |                              |                    |                       |         |                     |       |
| 45 |                              |                    |                       |         |                     |       |
| 46 |                              |                    |                       |         |                     |       |
| 47 |                              |                    |                       |         |                     |       |
| 48 |                              |                    |                       |         |                     |       |
| 49 |                              |                    |                       |         |                     |       |
| 50 |                              |                    |                       |         |                     |       |
| 51 |                              |                    |                       |         |                     |       |
| 52 |                              |                    |                       |         |                     |       |
| 53 |                              |                    |                       |         |                     |       |
| 54 |                              |                    |                       |         |                     |       |
| 55 |                              |                    |                       |         |                     |       |
| 56 |                              |                    |                       |         |                     |       |
| 57 |                              |                    |                       |         |                     |       |
| 58 |                              |                    |                       |         |                     |       |
| 59 |                              |                    |                       |         |                     |       |
| 60 |                              |                    |                       |         |                     |       |

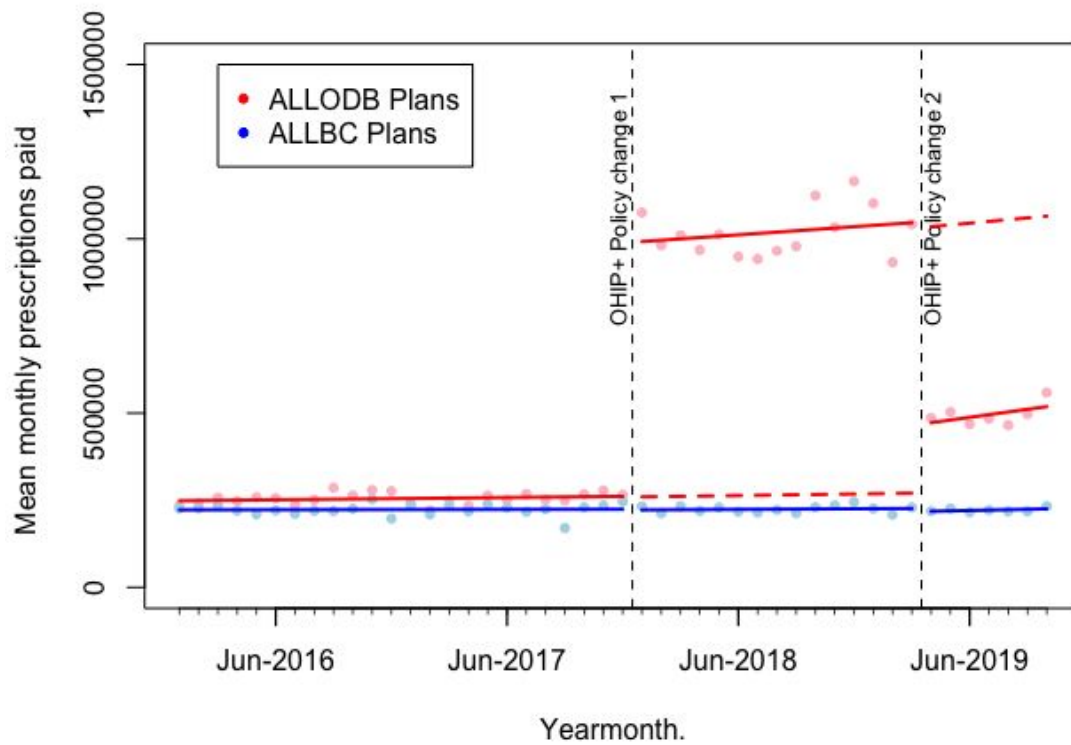

Figure S1: Average monthly number of prescriptions where at least a portion was paid by the benefits plan, before and after the first and second OHIP+ policy intervention changes in January 2018 and April 2019. The solid lines represent the estimated monthly rates and dashed lines (counterfactual), predicated estimates.

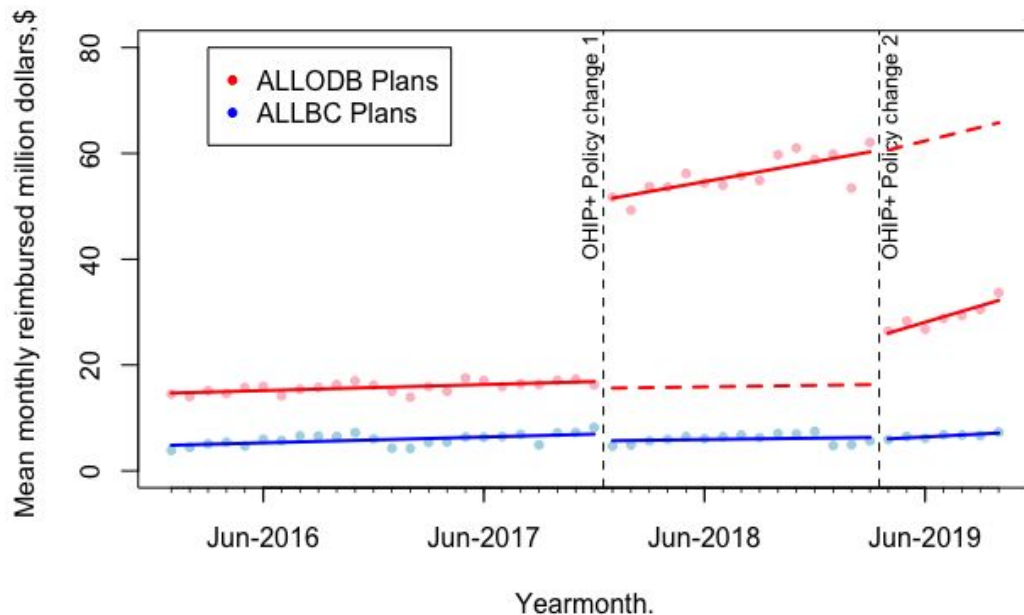

Figure S2: Interrupted time-series analysis of overall reimbursed dollars per month before and after the first and second OHIP+ policy intervention changes in January 2018 and April 2019. The solid lines represent the estimated monthly rates and dashed lines (counterfactual), predicated estimates.

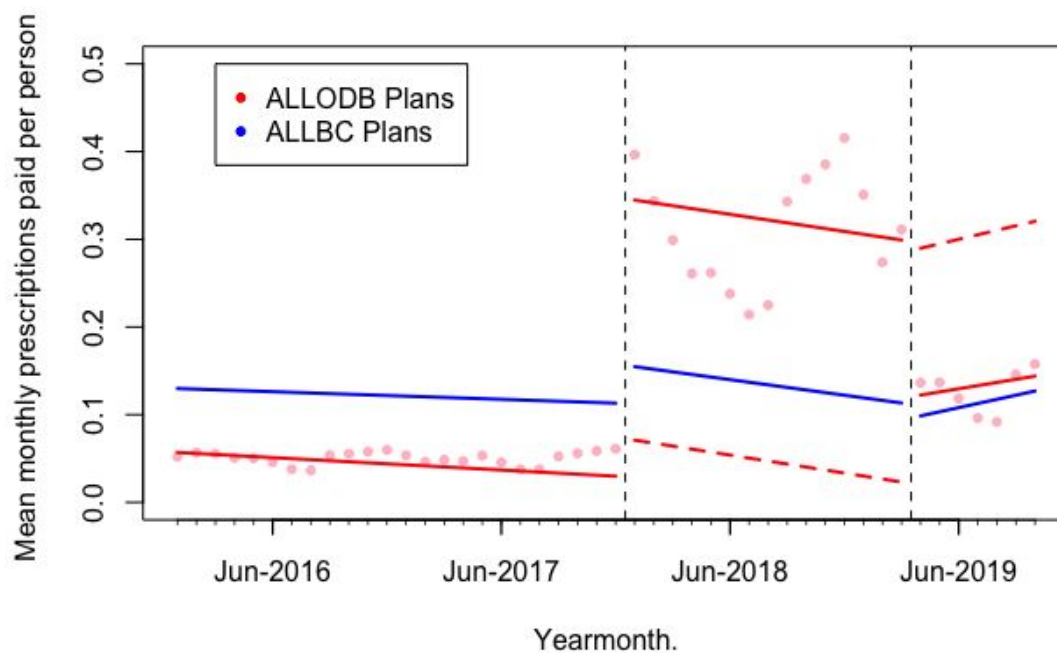

Figure S3: Average monthly number of asthma medication prescriptions per person per population where at least a portion was paid by the benefits plan, before and after the first and second OHIP+ policy intervention changes in January 2018 and in April 2019. The solid lines represent the estimated monthly rates and dashed lines (counterfactual), predicated estimates.

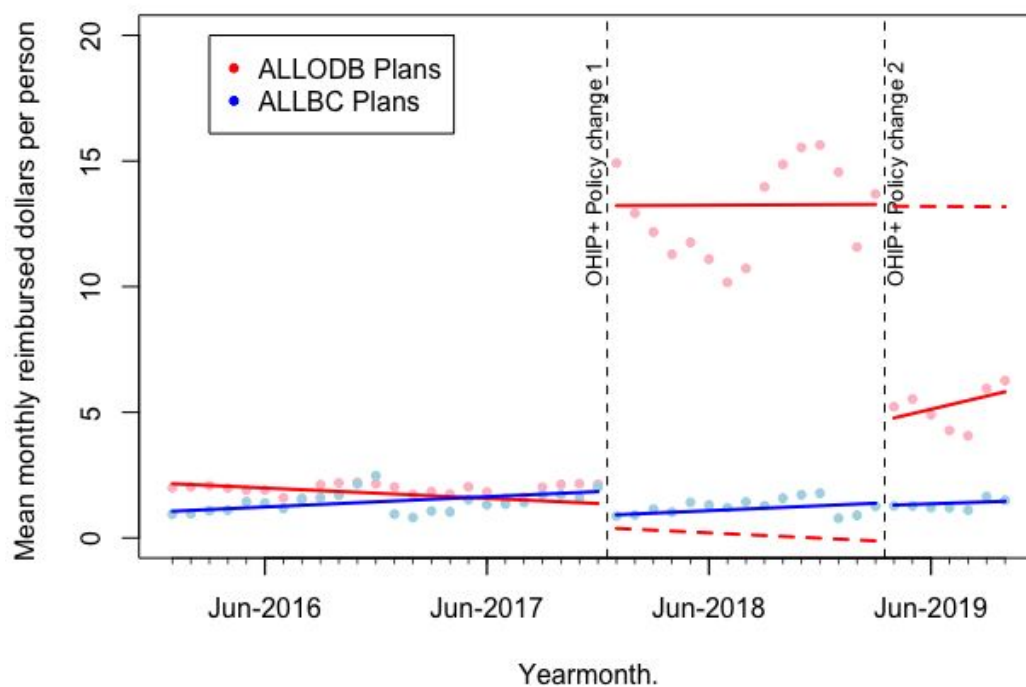

Figure S4: Interrupted time-series analysis of asthma medication reimbursed dollars per person per population before and after the first and second OHIP+ policy intervention changes in January 2018 and April 2019. The solid lines represent the estimated monthly rates and dashed lines (counterfactual), predicated estimates.

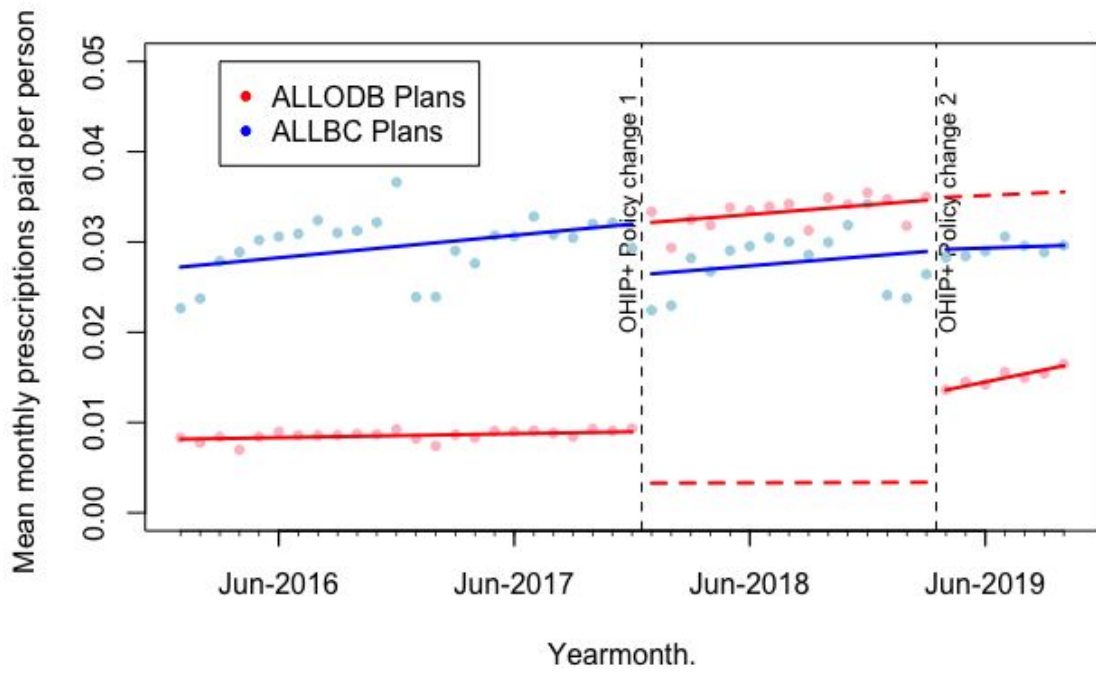

Figure S5: Average monthly number of diabetes publicly covered prescriptions per person per population where at least a portion was paid by the benefits plan, before and after the first and second OHIP+ policy intervention changes in January 2018 and in April 2019. The solid lines represent the estimated monthly rates and dashed lines (counterfactual), predicated estimates.

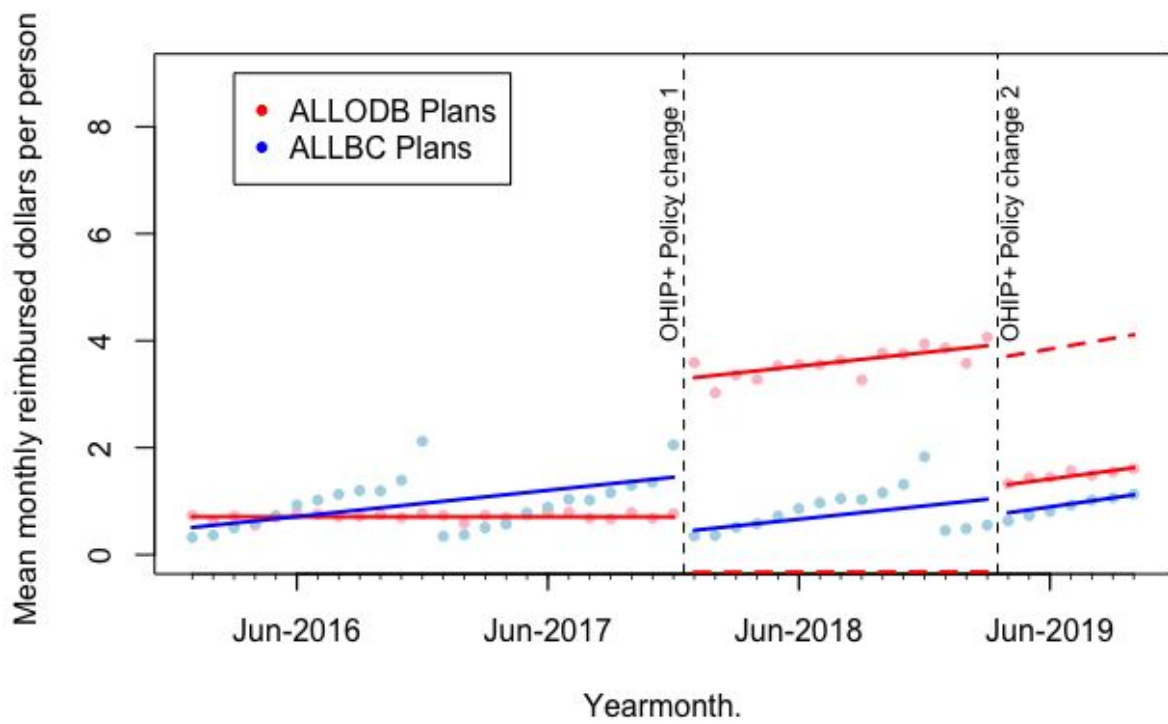

Figure S6: Interrupted time-series analysis of diabetes publicly covered medication reimbursed dollars per person per population before and after the first and second OHIP+ policy intervention changes in January 2018 and April 2019. The solid lines represent the estimated monthly rates and dashed lines (counterfactual), predicated estimates.
